# Supplementary material for: Feedback effects of boundary-layer meteorological factors on cumulative explosive growth of PM 2.5 during winter heavy pollution episodes in Beijing from 2013 to 2016
Source: Copernicus journal article supplement (doi:10.5194/acp-18-247-2018), 2018-01-10
Supplement: Supplementary file 1 [file acp-18-247-2018-supplement.pdf]

Supplement of Atmos. Chem. Phys., 18, 247–258, 2018  
<https://doi.org/10.5194/acp-18-247-2018-supplement>  
© Author(s) 2018. This work is distributed under  
the Creative Commons Attribution 4.0 License.

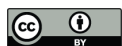

*Supplement of*

## **Feedback effects of boundary-layer meteorological factors on cumulative explosive growth of $\text{PM}_{2.5}$ during winter heavy pollution episodes in Beijing from 2013 to 2016**

**Junting Zhong et al.**

*Correspondence to:* Xiaoye Zhang (xiaoye@cma.gov.cn)

The copyright of individual parts of the supplement might differ from the CC BY 4.0 License.

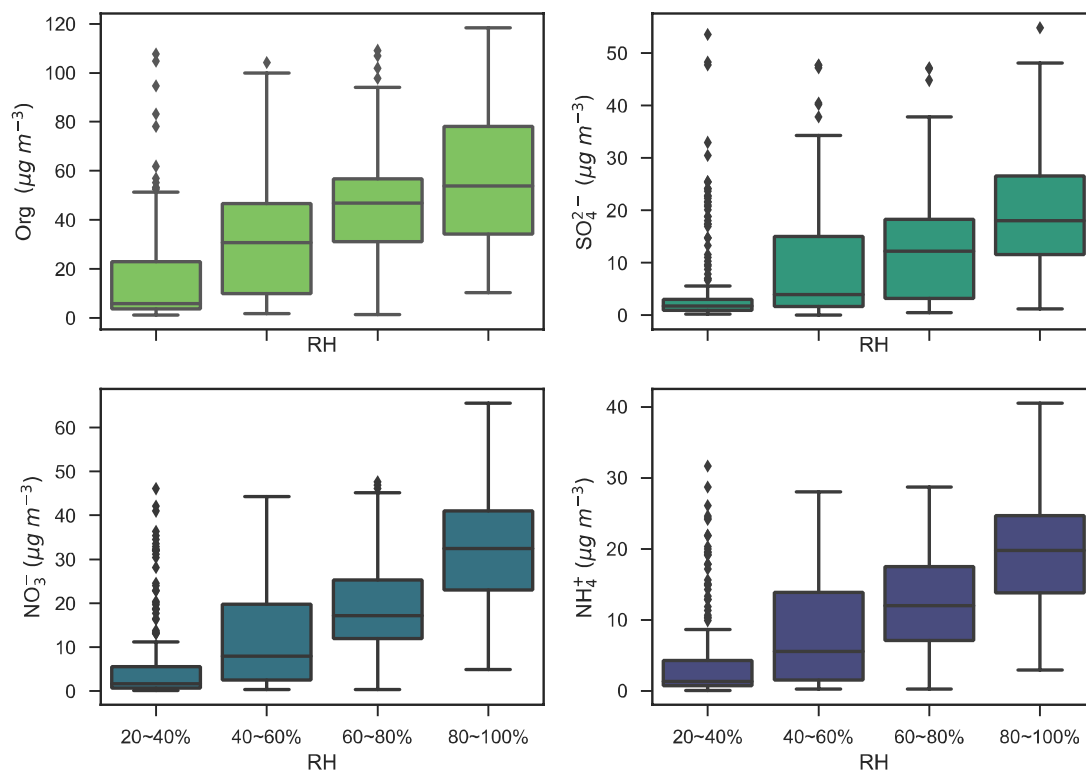

Figure S1. The distributions of aerosol species in  $PM_{10}$  in different ranges of RH from 1 December 2016 to 3 January 2017.

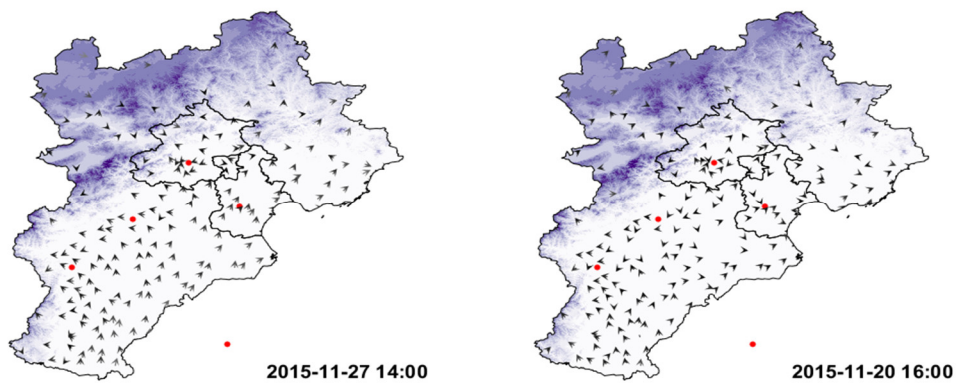

Figure S2. Surface wind distributions during the convergent explosive growth processes in November and December 2015 in the North China Plain.
